# Supplementary material for: Identification of 3-chymotrypsin like protease (3CLPro) inhibitors as potential anti-SARS-CoV-2 agents
Source: PubMed Central journal article supplement (PMC7817688; doi:10.1038/s42003-020-01577-x), 2021-01-20
Supplement: 42003_2020_1577_MOESM2_ESM.pdf [file 42003_2020_1577_MOESM2_ESM.pdf]

## **Identification of 3-chymotrypsin like protease (3CLPro) inhibitors as potential anti-SARS-CoV-2 agents**

Vicky Mody<sup>1#</sup>, Joanna Ho<sup>1</sup>, Savannah Wills<sup>1</sup>, Ahmed Mawri<sup>1</sup>, Latasha Lawson<sup>1</sup>, Maximilian C.C.J.C Ebert<sup>2</sup>, Guillaume M Fortin<sup>2</sup>, Srujana Rayalam<sup>1</sup>, and Shashidharamurthy Taval<sup>1#\*</sup>

<sup>#</sup>contributed equally

<sup>1</sup>Department of Pharmaceutical Sciences, School of Pharmacy, Philadelphia College of Osteopathic Medicine – Georgia Campus, Suwanee, GA, USA.

<sup>2</sup> Chemical Computing Group, 910-1010 Sherbrooke W, Montreal, Canada, QC H3A 2R7.

**Running Title:** Identification of potential inhibitors for SAR-CoV-2 3CLpro enzyme

**Key words:** SARS-CoV-2, 3CLpro, viral protease inhibitors, drug repurposing

\*Corresponding Author:

Shashidharamurthy Taval, Ph.D.,

Associate Professor, Department of Pharmaceutical Sciences,

Philadelphia College of Osteopathic Medicine, School of Pharmacy,

Room 3031, 625 Old Peachtree Road, Suwanee, GA-30024,

Tel: 678-407-7373, Fax: 678-407-7347, Email: [rangaiahsh@pcom.edu](mailto:rangaiahsh@pcom.edu)

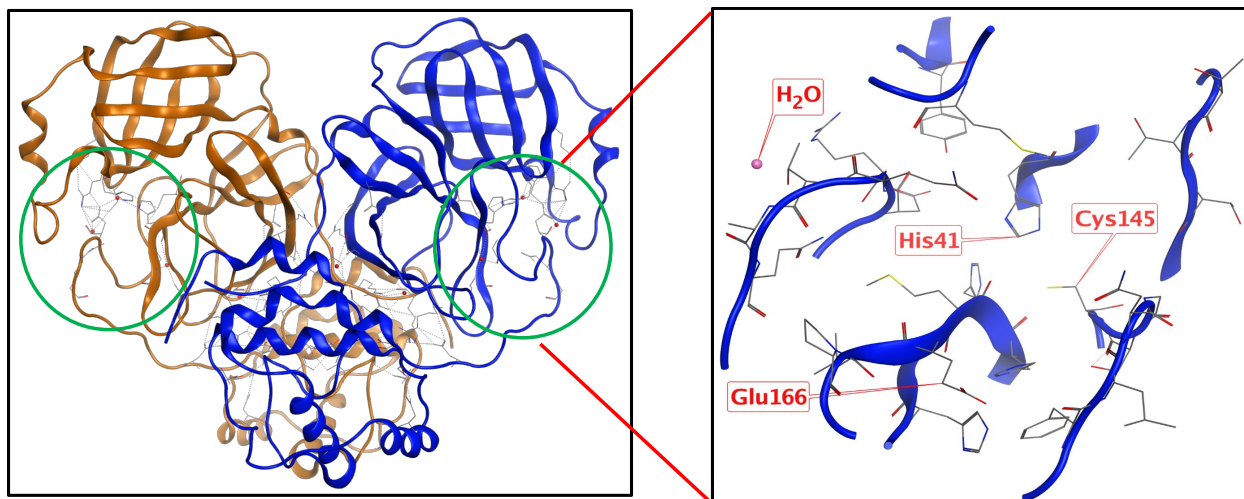

**Supplementary Figure 1: Structure of 3CLpro showing Cys<sup>145</sup>, His<sup>41</sup> and water molecules that are required for the catalytic function. a)** Structure of 3CLpro protein, green circle indicates the presence of Cys-145, His-41 and water (H<sub>2</sub>O) molecule at the active site. **b)** Expanded region of active site region that exhibits the molecules (Cys<sup>145</sup>, His<sup>41</sup> and Glu<sup>166</sup>) required for catalytic function.

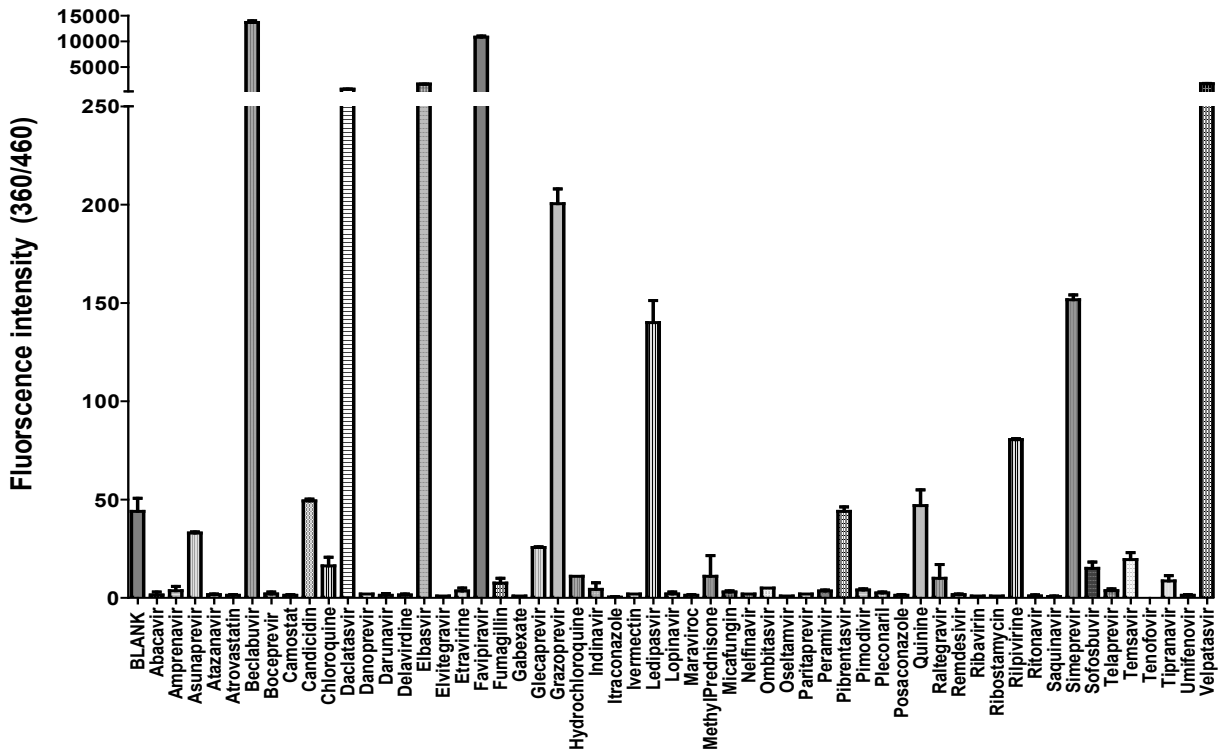

**Supplementary Figure 2: Drugs that exhibited autofluorescence at excitation/emission wavelength of 360/460nm.** Before performing the *in vitro* enzymatic assay for the selected drug candidates, the autofluorescence activity of all the drugs was examined. 10µl of 250µM of drugs was mixed with 40µl of assay buffer and read at 360/460nm (excitation/emission). Assay buffer with substrate served as blank. The final concentration of drugs and substrate was 50µM. Drugs exhibiting more than 200 fluorescence unit was eliminated from the enzymatic studies as the DMSO control samples fluorescence was around 200 (considered as 100% activity). The data were representative of two individual experiments in triplicates.

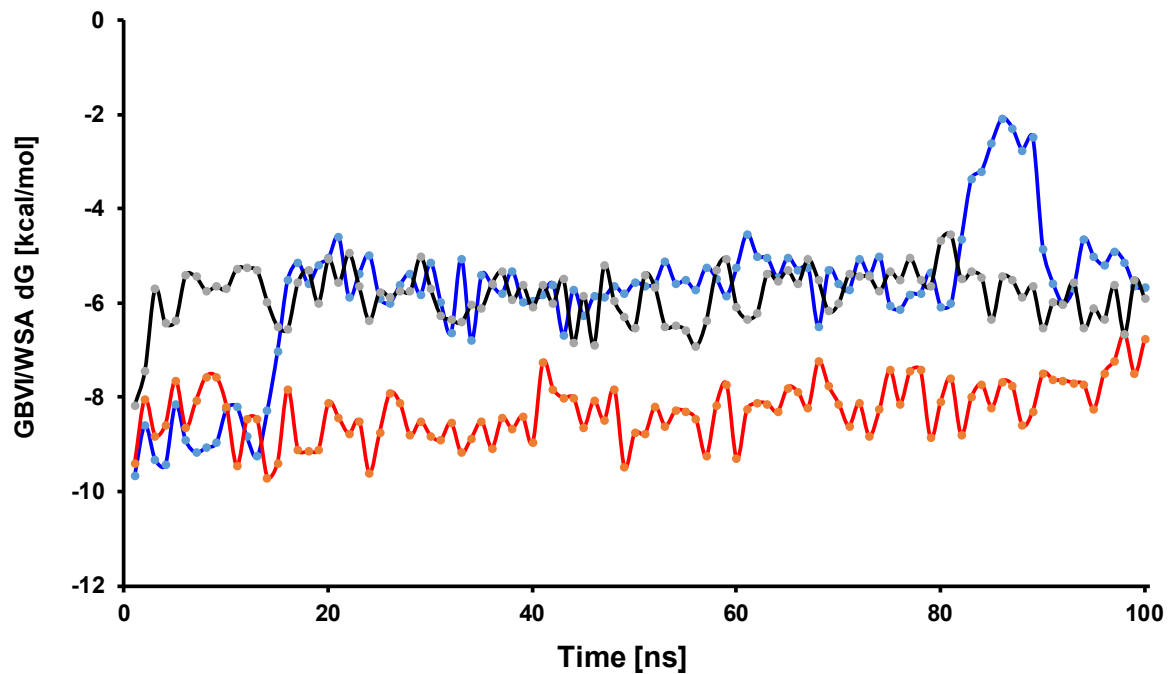

**Supplementary Figure 3: 100ns molecular dynamic (MD) simulation studies for ivermectin and Micafungin.** The S-score distribution vs time scale (ns) for ivermectin with monomer and homodimer form of 3CLpro, and micafungin with monomer form of 3CLpro.

**Supplementary table 1: List of all the viral protease, non-viral protease inhibitors and off target drugs with the mechanism of action.**

| Sl No.                               | Drug         | Mechanism of action                                                                                          | Clinical application  | Reference |
|--------------------------------------|--------------|--------------------------------------------------------------------------------------------------------------|-----------------------|-----------|
| Viral protease inhibitors (PIs)      |              |                                                                                                              |                       |           |
| 1                                    | Amprenavir   | Inhibitor of HIV-1 protease thereby prevents the processing of viral gag and gag-pol polyprotein precursors. | HIV-Infections        | 1         |
| 2                                    | Asunaprevir  | NS3 protease inhibitor                                                                                       | Hepatitis-C infection | 2         |
| 3                                    | Atazanavir   | Inhibitor of HIV-1 protease thereby prevents the processing of viral gag and gag-pol polyprotein precursors. | HIV-Infections        | 3         |
| 4                                    | Boceprevir   | NS3-4A serine protease                                                                                       | HCV-infections        | 4         |
| 5                                    | Camostat     | Serine protease inhibitor                                                                                    | SARS-CoV and MERS     | 5         |
| 6                                    | Danoprevir   | selective inhibitor of Hepatitis C Virus (HCV) NS3/4A protease                                               | Hepatitis-C infection | 5         |
| 7                                    | Darunavir    | Protease inhibitor                                                                                           | HIV-Infections        | 6         |
| 8                                    | Gabexate     | Protease inhibitor                                                                                           |                       | 7         |
| 9                                    | Glecaprevir  | NS3/4A protease inhibitor                                                                                    | Hepatitis-C infection | 8         |
| 10                                   | Indinavir    | Competitive protease inhibitor                                                                               | HIV-Infections        | 9         |
| 11                                   | Lopinavir    | HIV-1 Protease Inhibitor                                                                                     | HIV Infections        | 10        |
| 12                                   | Nilfinavir   | Binds to active site HIV Proteases                                                                           | HIV Infections        | 11        |
| 13                                   | Paritaprevir | Inhibits protease activity of nonstructural protein 3 and 4A (NS3/4A)                                        | Hepatitis-C infection | 12        |
| 14                                   | Ritonavir    | HIV – 1 Protease Inhibitor                                                                                   | HIV Infections        | 10        |
| 15                                   | Saquinavir   | HIV protease inhibitor                                                                                       | HIV Infections        | 13        |
| 16                                   | Sofosbuvir   | NS5B polymerase, thus inhibiting the HCV-RNA synthesis by RNA chain termination                              | HCV Infection         | 14        |
| 17                                   | Tipranavir   | Binds to active site of HIV proteases                                                                        | HIV-Infections        | 15        |
| Viral Non-Protease Inhibitors (VNIs) |              |                                                                                                              |                       |           |

|                         |              |                                                                                                               |                                           |    |
|-------------------------|--------------|---------------------------------------------------------------------------------------------------------------|-------------------------------------------|----|
| 18                      | Abacavir     | Nucleoside reverse transcriptase inhibitor (NRTI)                                                             | HIV infection                             | 16 |
| 19                      | Delavirdine  | Non-nucleoside HIV-1 reverse transcriptase inhibitor                                                          | HIV                                       | 17 |
| 20                      | Elvitegravir | Integrase inhibitor                                                                                           | HIV                                       | 18 |
| 21                      | Etravirine   | Nonnucleoside reverse transcriptase inhibitors                                                                | HIV                                       | 19 |
| 22                      | Ombitasvir   | Targets the nonstructural proteins (NS5A) and inhibits the viral replication and assembly                     | Hepatitis-C infection                     | 20 |
| 23                      | Oseltamvir   | inhibits the active site of the neuraminidase enzymes                                                         | Influenza viral infection                 | 21 |
| 24                      | Peramivir    | Neuraminidase inhibitor                                                                                       | Influenza viral infection                 | 22 |
| 25                      | Pibrentasvir | NS5A inhibitor                                                                                                |                                           | 8  |
| 26                      | Pimodivir    | Inhibits RNA-dependent RNA polymerase subunit 2 (PB2) to prevent replication                                  | Influenza-A infection                     | 23 |
| 27                      | Pleconaril   | Prevents viral replication by inhibiting viral uncoating and blocking viral attachment to host cell receptors | Enteroviruses and rhinoviruses infections | 24 |
| 28                      | Raltegravir  | Integrase inhibitor                                                                                           | HIV                                       | 18 |
| 29                      | Remdesivir   | RNA Dependent RNA Polymerase inhibitor                                                                        | COVID-19                                  | 25 |
| 30                      | Ribavirin    | Competitive inhibition of viral RNA polymerase                                                                | Hepatitis-C infection                     | 26 |
| 31                      | Temsavir     | Binds to gp120 and blocks CD4-induced conformational changes required for viral entry.                        | HIV Infections                            | 27 |
| 32                      | Telaprevir   | Protease inhibitors                                                                                           | Hepatitis-C infection                     | 28 |
| 33                      | Tenofovir    | Inhibits HIV-1 reverse transcriptase activity                                                                 | HIV infections                            | 29 |
| 34                      | Umifenovir   | Inhibits of membrane fusion virus and host plasma membranes.                                                  | Broad Spectrum                            | 30 |
| Off Target Drugs (OTDs) |              |                                                                                                               |                                           |    |
| 35                      | Atrovastatin | HMG-CoA Reductase Inhibitor                                                                                   | Lipid Lowering Agent                      | 31 |
| 36                      | Candicidin   | polyene antibiotic                                                                                            | Fungal infections                         | 32 |

|    |                       |                                                                                                                                                                                                                                                                        |                                                |       |
|----|-----------------------|------------------------------------------------------------------------------------------------------------------------------------------------------------------------------------------------------------------------------------------------------------------------|------------------------------------------------|-------|
| 37 | Chloroquine Phosphate | Inhibition of heme detoxification                                                                                                                                                                                                                                      | Uncomplicated non-falciparum malaria infection | 33,34 |
| 38 | Fumagillin            | RNA synthesis, but may also act by inhibiting a key proteinase, type 2 methionine aminopeptidase                                                                                                                                                                       | Parasitic infection                            | 35,36 |
| 39 | Hydrochloroquine      | Inhibition of heme detoxification                                                                                                                                                                                                                                      | Uncomplicated non-falciparum malaria infection | 34    |
| 40 | Itraconazole          | inhibits ergosterol synthesis,                                                                                                                                                                                                                                         | Fungal infections                              | 37    |
| 41 | Ivermectin            | Inhibits chloride channels that are required for neuromuscular transmission in parasitic worms                                                                                                                                                                         | Nematode infections                            | 38    |
| 42 | Maraviroc             | CCR5 antagonist                                                                                                                                                                                                                                                        | HIV infection                                  | 39    |
| 43 | MethylPrednisone      | Anti-inflammatory                                                                                                                                                                                                                                                      | Inflammatory disorders                         | 40    |
| 44 | Micafungin            | Inhibits $\beta$ -1-3 glucan synthase                                                                                                                                                                                                                                  | Broad spectrum of fungal infection             | 41    |
| 45 | Posaconazole          | Inhibits 14- $\alpha$ -demethylase                                                                                                                                                                                                                                     | Fungal infections                              | 42    |
| 46 | Quinine               | Intercalation with parasite DNA, interrupting replication and transcription. Interaction with erythrocyte fatty acids, promoting hemolysis and preventing schizont maturation. Alkalinization of parasite digestive vacuoles, interfering with hemoglobin degradation. | Antimalarial                                   | 35    |
| 47 | Ribostamycin sulfate  | binding to the bacterial 30S ribosomal subunit, causing misreading of mRNA and leaving the bacterium unable to synthesize proteins vital to its growth.                                                                                                                | Antibacterial                                  | 43    |

## References:

- 1 Humpolíčková, J. *et al.* Inhibition of the precursor and mature forms of HIV-1 protease as a tool for drug evaluation. *Scientific Reports* **8**, 10438, doi:10.1038/s41598-018-28638-w (2018).
- 2 Scola, P. M. *et al.* The Discovery of Asunaprevir (BMS-650032), An Orally Efficacious NS3 Protease Inhibitor for the Treatment of Hepatitis C Virus Infection. *Journal of Medicinal Chemistry* **57**, 1730-1752, doi:10.1021/jm500297k (2014).
- 3 Rivas, P., Morello, J., Garrido, C., Rodríguez-Nóvoa, S. & Soriano, V. Role of atazanavir in the treatment of HIV infection. *Ther Clin Risk Manag* **5**, 99-116 (2009).
- 4 Takaguchi, K. *et al.* Real-world virological efficacy and safety of daclatasvir/asunaprevir/beclabuvir in patients with chronic hepatitis C virus genotype 1 infection in Japan. *Journal of Gastroenterology* **54**, 742-751, doi:10.1007/s00535-019-01568-8 (2019).
- 5 Uno, Y. Camostat mesilate therapy for COVID-19. *Intern Emerg Med*, 1-2, doi:10.1007/s11739-020-02345-9 (2020).
- 6 Lascar, R. M. & Benn, P. Role of darunavir in the management of HIV infection. *HIV AIDS (Auckl)* **1**, 31-39, doi:10.2147/hiv.s5397 (2009).
- 7 Yuksel, M., Okajima, K., Uchiba, M. & Okabe, H. Gabexate Mesilate, a Synthetic Protease Inhibitor, Inhibits Lipopolysaccharide-Induced Tumor Necrosis Factor- $\alpha$  Production by Inhibiting Activation of Both Nuclear Factor- $\kappa$ B and Activator Protein-1 in Human Monocytes. *Journal of Pharmacology and Experimental Therapeutics* **305**, 298, doi:10.1124/jpet.102.041988 (2003).
- 8 Cotter, T. G. & Jensen, D. M. Glecaprevir/pibrentasvir for the treatment of chronic hepatitis C: design, development, and place in therapy. *Drug Des Devel Ther* **13**, 2565-2577, doi:10.2147/DDDT.S172512 (2019).
- 9 Tredwell, M. & Gouverneur, V. in *Comprehensive Chirality* (eds Erick M. Carreira & Hisashi Yamamoto) 70-85 (Elsevier, 2012).
- 10 Chandwani, A. & Shuter, J. Lopinavir/ritonavir in the treatment of HIV-1 infection: a review. *Ther Clin Risk Manag* **4**, 1023-1033, doi:10.2147/tcrm.s3285 (2008).
- 11 De Clercq, E. Anti-HIV drugs: 25 compounds approved within 25 years after the discovery of HIV. *International journal of antimicrobial agents* **33**, 307-320, doi:10.1016/j.ijantimicag.2008.10.010 (2009).
- 12 Moradpour, D. & Penin, F. Hepatitis C virus proteins: from structure to function. *Current topics in microbiology and immunology* **369**, 113-142, doi:10.1007/978-3-642-27340-7\_5 (2013).
- 13 Vella, S. & Floridia, M. Saquinavir. *Clinical Pharmacokinetics* **34**, 189-201, doi:10.2165/00003088-199834030-00002 (1998).
- 14 Bhatia, H. K., Singh, H., Grewal, N. & Natt, N. K. Sofosbuvir: A novel treatment option for chronic hepatitis C infection. *J Pharmacol Pharmacother* **5**, 278-284, doi:10.4103/0976-500X.142464 (2014).
- 15 in *LiverTox: Clinical and Research Information on Drug-Induced Liver Injury* (2012).
- 16 Barbarino, J. M., Kroetz, D. L., Altman, R. B. & Klein, T. E. PharmGKB summary: abacavir pathway. *Pharmacogenet Genomics* **24**, 276-282, doi:10.1097/FPC.0000000000000040 (2014).
- 17 W.W., F. Vol. 394. *Antiviral Chemotherapy 4. Advances in Experimental Medicine and Biology*, (eds Mills J;, Volberding P.A.; & Corey L) (Springer, , Boston, MA, 1996).



- 18 Shimura, K. & Kodama, E. N. Elvitegravir: A New HIV Integrase Inhibitor. *Antiviral Chemistry and Chemotherapy* **20**, 79-85, doi:10.3851/imp1397 (2009).
- 19 Usach, I., Melis, V. & Peris, J.-E. Non-nucleoside reverse transcriptase inhibitors: a review on pharmacokinetics, pharmacodynamics, safety and tolerability. *J Int AIDS Soc* **16**, 1-14, doi:10.7448/IAS.16.1.18567 (2013).
- 20 Gentile, I., Buonomo, A. R. & Borgia, G. Ombitasvir: a potent pan-genotypic inhibitor of NS5A for the treatment of hepatitis C virus infection. *Expert Rev Anti Infect Ther* **12**, 1033-1043, doi:10.1586/14787210.2014.940898 (2014).
- 21 Davies, B. E. Pharmacokinetics of oseltamivir: an oral antiviral for the treatment and prophylaxis of influenza in diverse populations. *J Antimicrob Chemother* **65 Suppl 2**, ii5-ii10, doi:10.1093/jac/dkq015 (2010).
- 22 Alame, M. M., Massaad, E. & Zaraket, H. Peramivir: A Novel Intravenous Neuraminidase Inhibitor for Treatment of Acute Influenza Infections. *Front Microbiol* **7**, 450-450, doi:10.3389/fmicb.2016.00450 (2016).
- 23 Clark, M. P. *et al.* Discovery of a novel, first-in-class, orally bioavailable azaindole inhibitor (VX-787) of influenza PB2. *J Med Chem* **57**, 6668-6678, doi:10.1021/jm5007275 (2014).
- 24 Painsil, E. & Cheng, Y.-C. in *Encyclopedia of Microbiology (Third Edition)* (ed Moselio Schaechter) 223-257 (Academic Press, 2009).
- 25 Eastman, R. T. *et al.* Remdesivir: A Review of Its Discovery and Development Leading to Emergency Use Authorization for Treatment of COVID-19. *ACS Cent Sci* **6**, 672-683, doi:10.1021/acscentsci.0c00489 (2020).
- 26 Te, H. S., Randall, G. & Jensen, D. M. Mechanism of action of ribavirin in the treatment of chronic hepatitis C. *Gastroenterol Hepatol (N Y)* **3**, 218-225 (2007).
- 27 Zhang, Y., Chapman, J. H., Ulcay, A. & Sutton, R. E. Neutralization Synergy between HIV-1 Attachment Inhibitor Fostemsavir and Anti-CD4 Binding Site Broadly Neutralizing Antibodies against HIV. *Journal of Virology* **93**, e01446-01418, doi:10.1128/JVI.01446-18 (2019).
- 28 Pan, Q., Peppelenbosch, M. P., Janssen, H. L. A. & de Knegt, R. J. Telaprevir/boceprevir era: from bench to bed and back. *World J Gastroenterol* **18**, 6183-6188, doi:10.3748/wjg.v18.i43.6183 (2012).
- 29 Mayadas, T. N., Tsokos, G. C. & Tsuboi, N. Mechanisms of immune complex-mediated neutrophil recruitment and tissue injury. *Circulation* **120**, 2012-2024, doi:120/20/2012 [pii 10.1161/CIRCULATIONAHA.108.771170 (2009)].
- 30 Haviernik, J. *et al.* Arbidol (Umifenovir): A Broad-Spectrum Antiviral Drug That Inhibits Medically Important Arthropod-Borne Flaviviruses. *Viruses* **10**, 184, doi:10.3390/v10040184 (2018).
- 31 McIver, L. A. & Siddique, M. S. in *StatPearls*. (StatPearls Publishing Copyright © 2020, StatPearls Publishing LLC., 2020).
- 32 Hammond, S. M. & Kligler, B. N. Mode of action of the polyene antibiotic candicidin: binding factors in the wall of *Candida albicans*. *Antimicrob Agents Chemother* **9**, 561-568, doi:10.1128/aac.9.4.561 (1976).
- 33 Capela, R., Moreira, R. & Lopes, F. An Overview of Drug Resistance in Protozoal Diseases. *Int J Mol Sci* **20**, 5748, doi:10.3390/ijms20225748 (2019).

- 34 Browning, D. J. Pharmacology of Chloroquine and Hydroxychloroquine. *Hydroxychloroquine and Chloroquine Retinopathy*, 35-63, doi:10.1007/978-1-4939-0597-3\_2 (2014).
- 35 Kuhlmann, F. M. & Fleckenstein, J. M. in *Infectious Diseases (Fourth Edition)* (eds Jonathan Cohen, William G. Powderly, & Steven M. Opal) 1345-1372.e1342 (Elsevier, 2017).
- 36 Sin, N. *et al.* The anti-angiogenic agent fumagillin covalently binds and inhibits the methionine aminopeptidase, MetAP-2. *Proc Natl Acad Sci U S A* **94**, 6099-6103, doi:10.1073/pnas.94.12.6099 (1997).
- 37 Kurn H, W. R. Itraconazole. *StatPearls* (2020).  
<<https://www.ncbi.nlm.nih.gov/books/NBK557874/>>.
- 38 in *LiverTox: Clinical and Research Information on Drug-Induced Liver Injury* (National Institute of Diabetes and Digestive and Kidney Diseases, 2012).
- 39 Ray, N. Maraviroc in the treatment of HIV infection. *Drug Des Devel Ther* **2**, 151-161, doi:10.2147/dddt.s3474 (2009).
- 40 Sloka, J. S. & Stefanelli, M. The mechanism of action of methylprednisolone in the treatment of multiple sclerosis. *Multiple Sclerosis Journal* **11**, 425-432, doi:10.1191/1352458505ms1190oa (2005).
- 41 Perlin, D. S. Mechanisms of echinocandin antifungal drug resistance. *Ann N Y Acad Sci* **1354**, 1-11, doi:10.1111/nyas.12831 (2015).
- 42 Braga, S. S. Multi-target drugs active against leishmaniasis: A paradigm of drug repurposing. *European journal of medicinal chemistry* **183**, 111660, doi:10.1016/j.ejmech.2019.111660 (2019).
- 43 Kotra, L. P., Haddad, J. & Mobashery, S. Aminoglycosides: perspectives on mechanisms of action and resistance and strategies to counter resistance. *Antimicrob Agents Chemother* **44**, 3249-3256, doi:10.1128/aac.44.12.3249-3256.2000 (2000).
